# Supplementary material
Source: Springer Nature journal article supplement (https://www.springerprofessional.de/resource/supplementary/40192_2012_2_MOESM4_ESM.pdf/11899466)

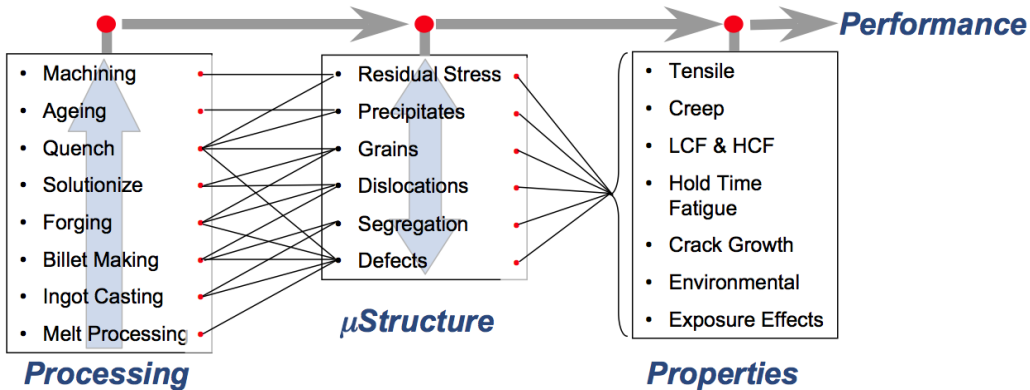

Supplement: MOESM4 [file 11899466]
